# Supplementary material for: Structure–property relationships of cellulose nanofibril hydro- and aerogels and their building blocks
Source: Royal Society of Chemistry journal article supplement (doi:10.1039/d0nr01362e), 2020-01-01
Supplement: d0nr01362e1.pdf [file d0nr01362e1.pdf]

## Supplementary Information for

# **Structure property relationships of cellulose nanofibril hydro- and aerogels and their building blocks**

*Mario Arcari<sup>1</sup>, Robert Axelrod<sup>1</sup>, Jozef Adamcik<sup>1</sup>, Stephan Handschin<sup>1</sup>, Antoni Sánchez-Ferrer<sup>1</sup>, Raffaele Mezzenga<sup>1,2\*</sup>, and Gustav Nyström<sup>1,3\*</sup>*

1. ETH Zurich Department of Health Science and Technology, Schmelzbergstrasse 9, LFO E23 Zurich 8092, Switzerland.

2. ETH Zurich, Department of Materials, Wolfgang-Pauli-Strasse 10, 8093 Zurich, Switzerland.

3. EMPA, Laboratory for Cellulose & Wood Materials, Überlandstrasse 129, 8600 Dübendorf, Switzerland.

\*Correspondence to: [raffaele.mezzenga@hest.ethz.ch](mailto:raffaele.mezzenga@hest.ethz.ch), [gustav.nystroem@empa.ch](mailto:gustav.nystroem@empa.ch)

Supplementary figures

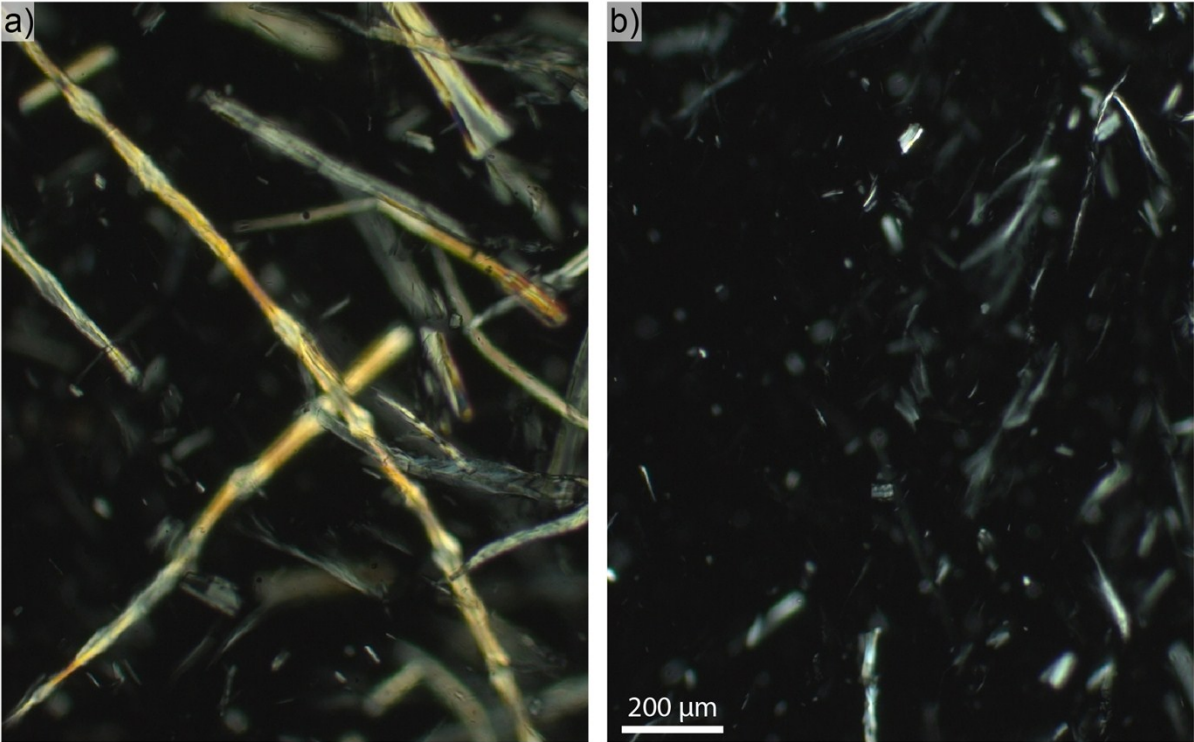

**Figure S1.** Polarized light micrographs of CNF dispersion (0.5 wt%) from unbleached pulp after 11 min sonication. a) 20 min centrifugation at 4000 rcf and b) after additional 90 min centrifugation at 12000 rcf.

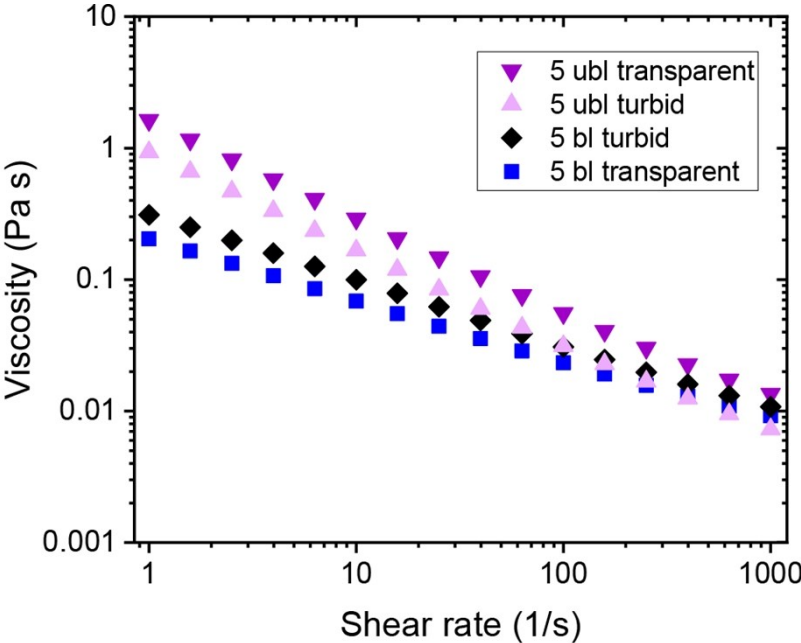

**Figure S2.** Rheological behavior of transparent and turbid CNF dispersions (0.40 wt%) using a double gap geometry.

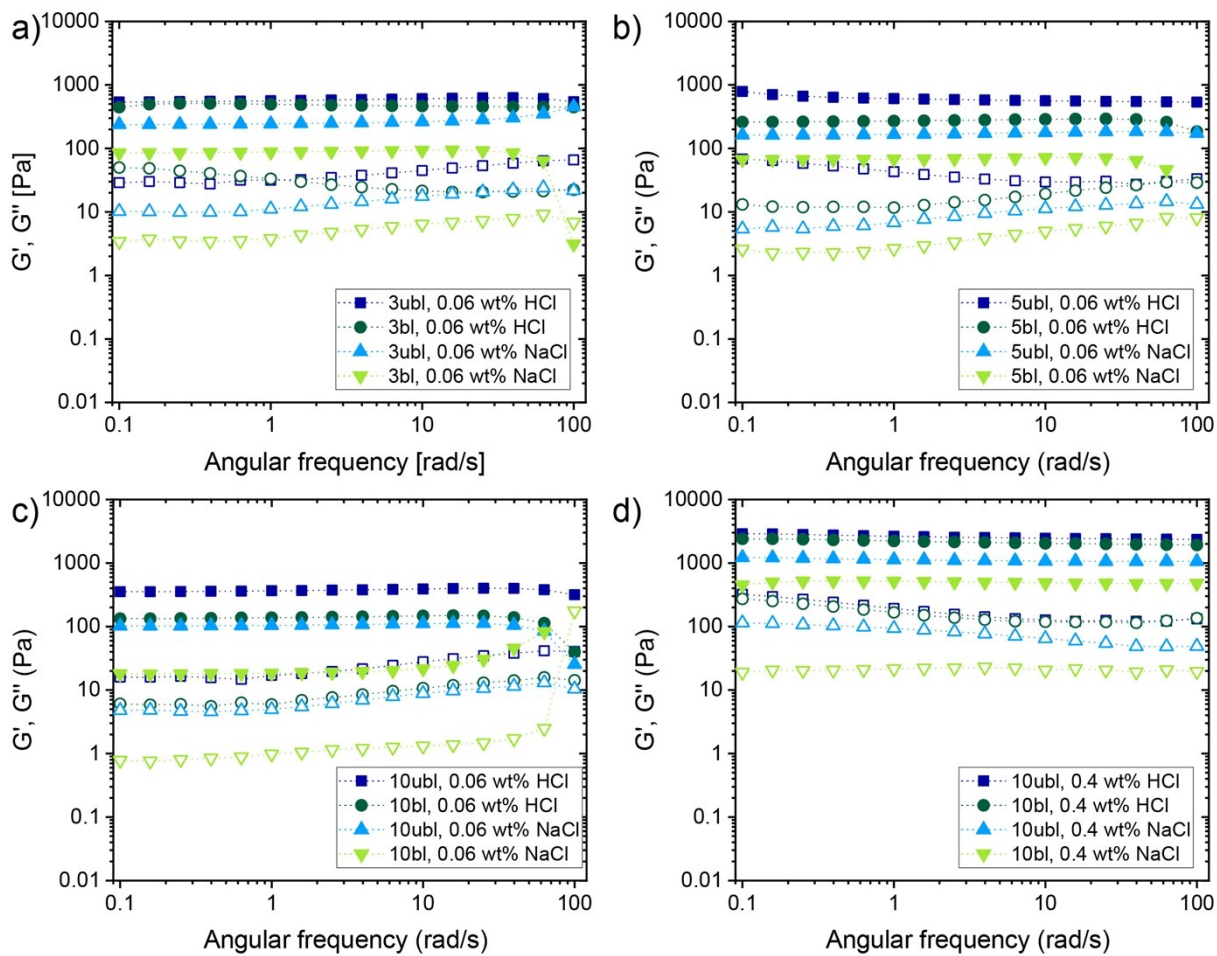

**Figure S3.** Elastic and viscous shear moduli across the measured angular frequency  $\omega$  range of a) 3 mmol, b) 5 mmol and c) 10 mmol at 0.06 wt% CNF, and d) 10 mmol at 0.4 wt%.

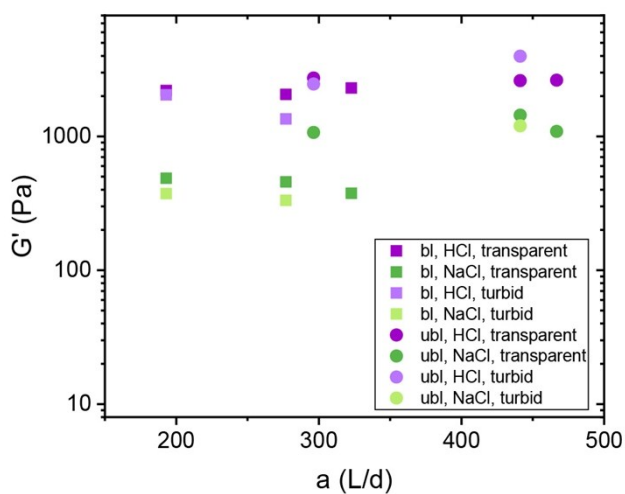

**Figure S4.** Comparison of elastic shear modulus  $G'$  depending on aspect ratio of transparent and turbid CNF dispersions.

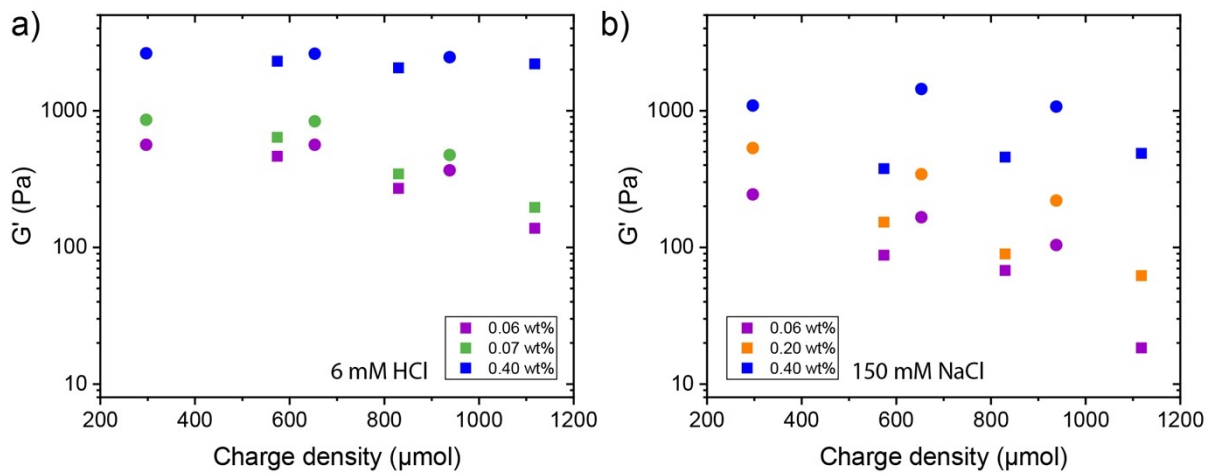

**Figure S5.** Dependency of the elastic shear modulus ( $G'$ ) on charge density of the gels at  $\omega = 1$  rad/s,  $\gamma = 0.5\%$  and  $20^\circ\text{C}$  for different concentrations after adding a) 6 mM HCl and b) 150 mM NaCl. The squares represent CNFs from bleached pulps, the circles unbleached, respectively.

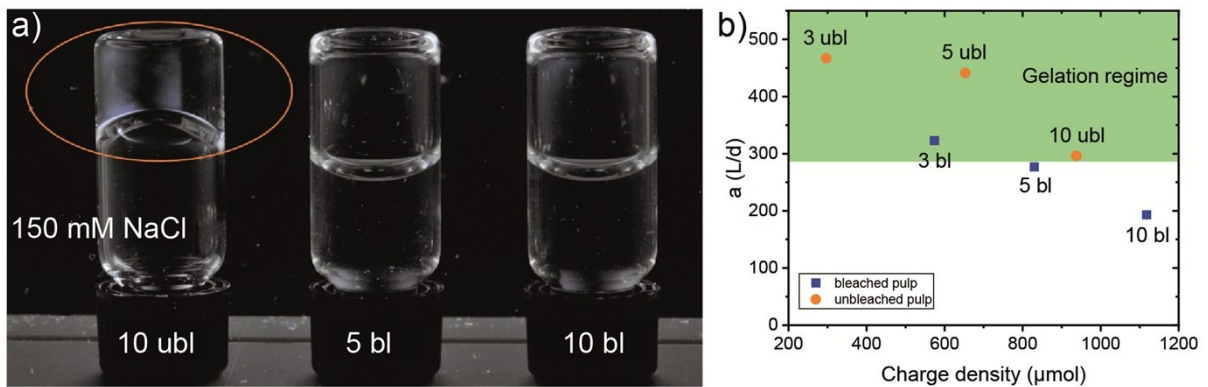

**Figure S6.** a) Inversion test and b) gelation dependency on aspect ratio as function of charge density of CNFs from bleached and unbleached pulp at 0.06 wt% due to addition of 150 mM NaCl.

## Supplementary table

**Table S1.** Parameters obtained from AFM image analysis for all different CNF samples. Data adapted from ref 1 where the mean, standard deviation (stdD) and standard error (stdE) has been from sample sizes of  $n > 200$ .

| Sample name | Mean length (nm) | stdD | stdE | Length weighted length (nm) | stdD | stdE | Inverse kink density | Average segment length (nm) | Number of kinks per fibril | Charge density ( $\mu\text{mol/g}$ ) |
|-------------|------------------|------|------|-----------------------------|------|------|----------------------|-----------------------------|----------------------------|--------------------------------------|
| 3bl         | 292              | 283  | 11   | 567                         | 395  | 15   | 239                  | 132                         | 1.22                       | 570                                  |
| 5bl         | 272              | 242  | 14   | 486                         | 323  | 19   | 257                  | 132                         | 1.06                       | 830                                  |
| 10bl        | 204              | 166  | 8    | 339                         | 214  | 10   | 340                  | 127                         | 0.60                       | 1100                                 |
| 3ubl        | 454              | 408  | 23   | 819                         | 548  | 31   | 253                  | 163                         | 1.79                       | 230                                  |
| 5ubl        | 459              | 381  | 24   | 774                         | 495  | 31   | 303                  | 183                         | 1.51                       | 650                                  |
| 10ubl       | 268              | 261  | 17   | 520                         | 363  | 24   | 411                  | 162                         | 0.65                       | 940                                  |

## References

- 1 M. Arcari, E. Zuccarella, R. Axelrod, J. Adamcik, A. Sánchez-Ferrer, R. Mezzenga and G. Nyström, *Biomacromolecules*, 2019, **20**, 1288–1296.
